# Supplementary material for: Investigation of the Guinea fowl and domestic fowl hybrids as potential surrogate hosts for avian cryopreservation programmes
Source: PubMed Central journal article supplement (PMC6776557; doi:10.1038/s41598-019-50763-3), 2019-10-03
Supplement: 41598_2019_50763_MOESM1_ESM.pdf [file 41598_2019_50763_MOESM1_ESM.pdf]

Supplementary information

for

**Investigation of the Guinea fowl and domestic fowl hybrids as potential surrogate hosts for avian cryopreservation programmes**

Mariann Molnár<sup>1</sup>, Bence Lázár<sup>1,2</sup>, Nikoletta Sztán<sup>1</sup>, Barbara Végi<sup>1</sup>, Árpád Drobnyák<sup>1</sup>, Roland Tóth<sup>2</sup>, Krisztina Liptói<sup>1</sup>, Miklós Marosán<sup>3</sup>, Elen Gócza<sup>2</sup>, Sunil Nandi<sup>4</sup>, Michael J. McGrew<sup>4</sup>, Eszter Patakiné Várkonyi<sup>1\*</sup>

## **Supplementary figures 1-8.: Allele sizes of hybrid, control domestic fowl and guinea fowl samples**

Marker GUJ1 resulted allele 262 bp in domestic fowl (DF) and allele 241 bp; 243 bp in guinea fowl (GF). Hybrid 1 (H1) received one allele from domestic fowl (264 bp) and another from guinea fowl (243 bp). Hybrid 2 (H2) also have one allele from chicken (260 bp) and another from guinea fowl (243 bp). In case of marker GUJ87 there is allele 161 bp in domestic fowl (DF) and allele 153 bp in guinea fowl (DF) in homozygous form. Both hybrids (H1, H2) received both alleles (153 bp and 161 bp).

Figure 1: GUJ1\_DF

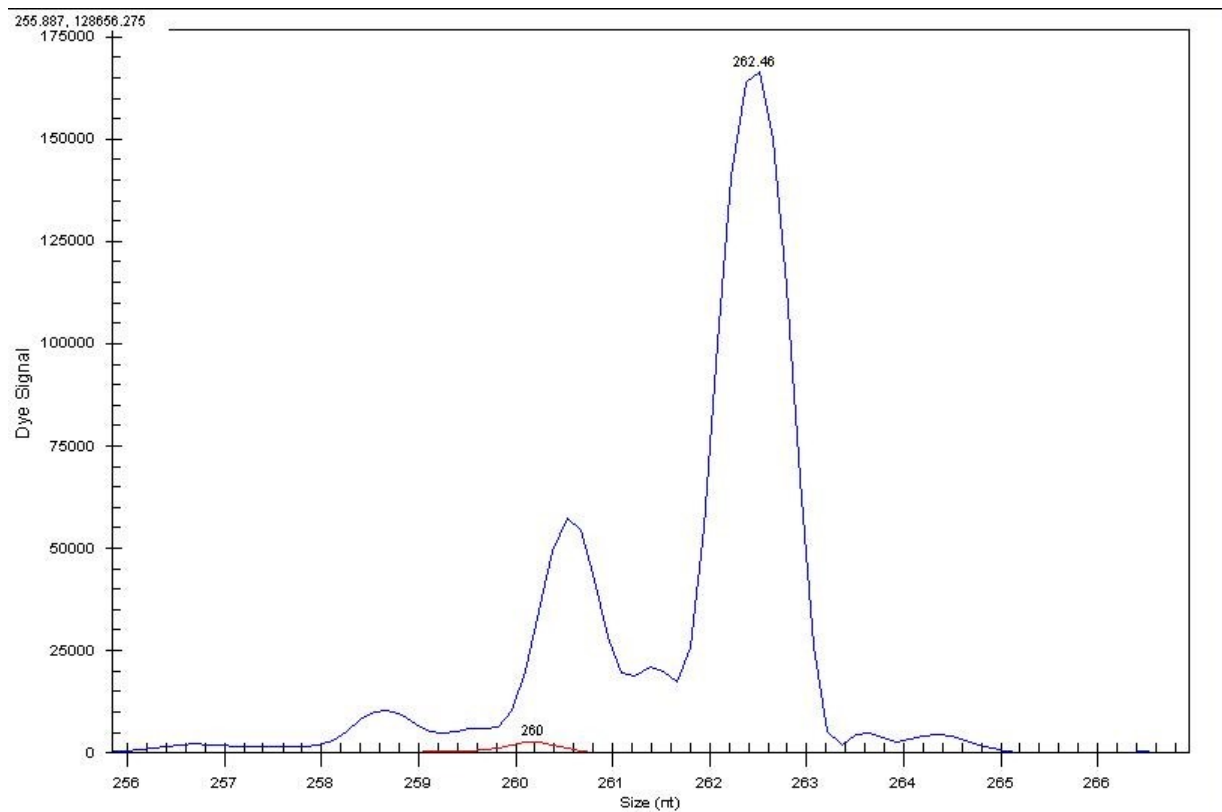

Figure 2: GUJ1\_GF

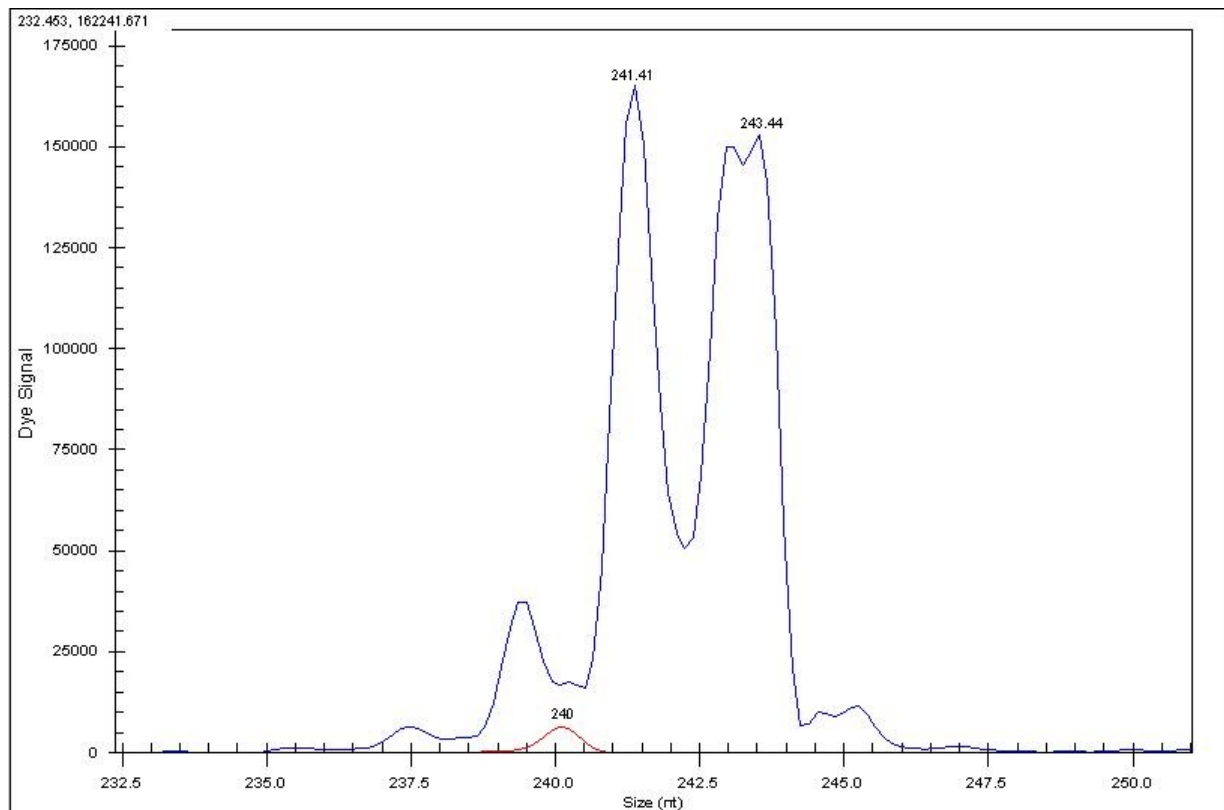

Figure 3: GUJ1\_H1

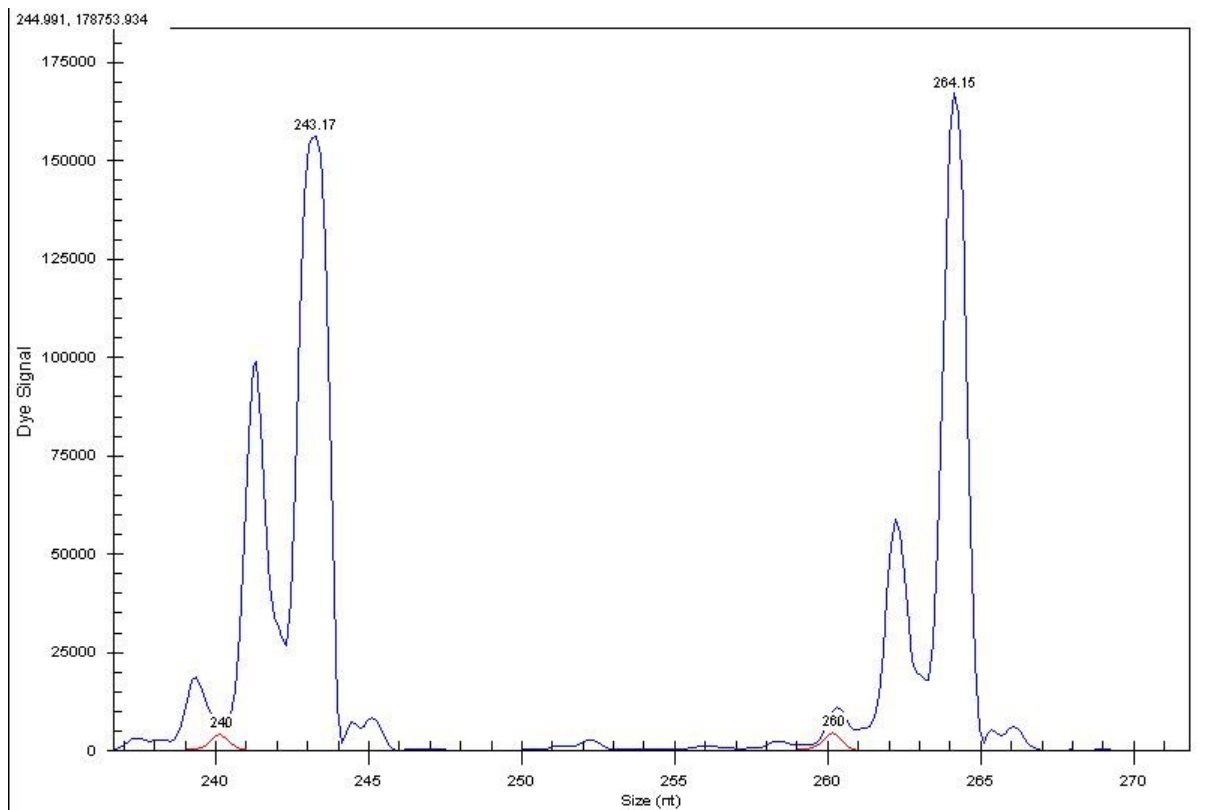

Figure 4: GUJ1\_H2

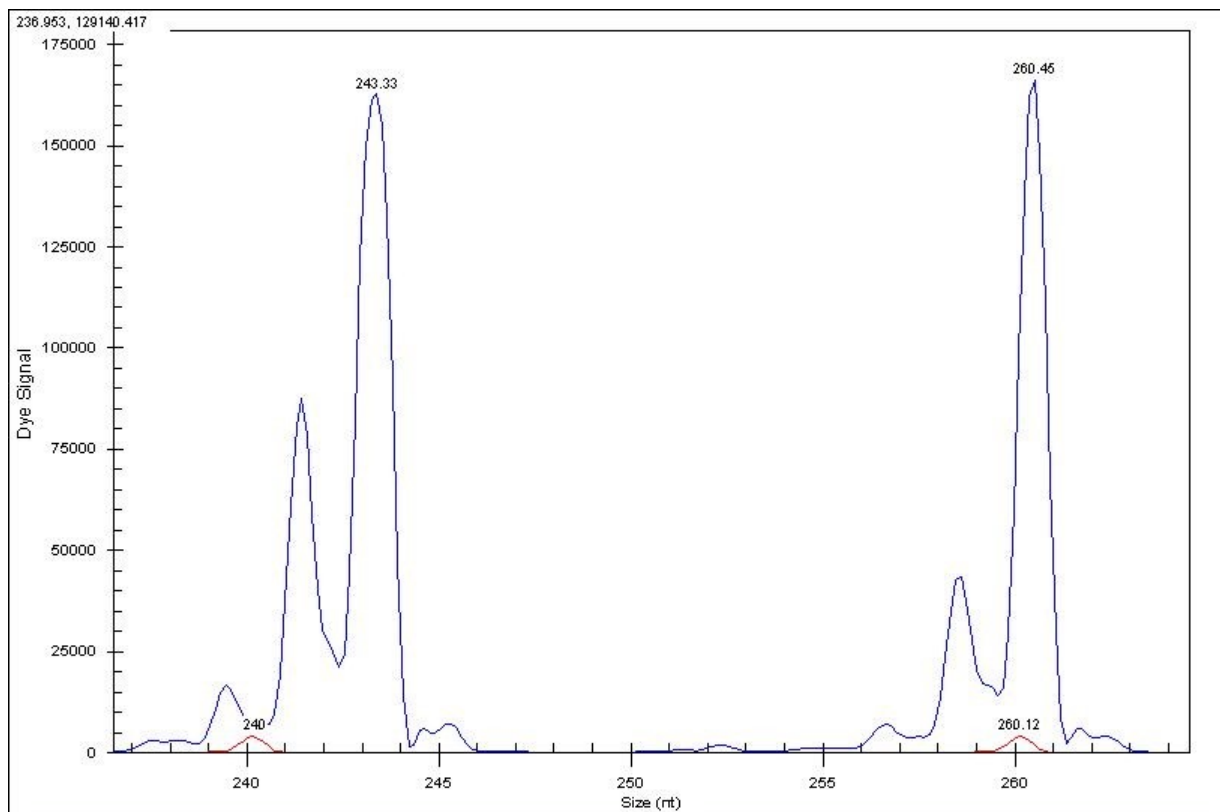

Figure 5: GUJ87\_DF

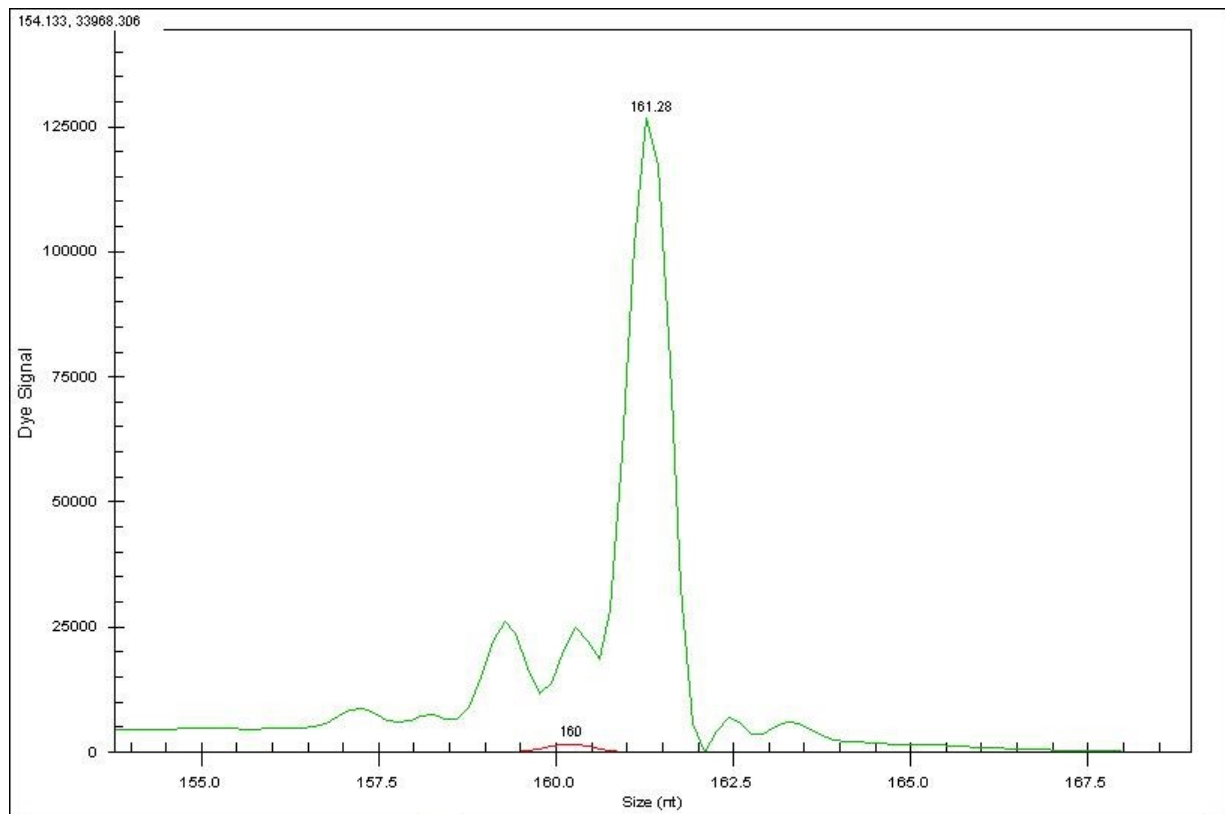

Figure 6: GUJ87\_GF

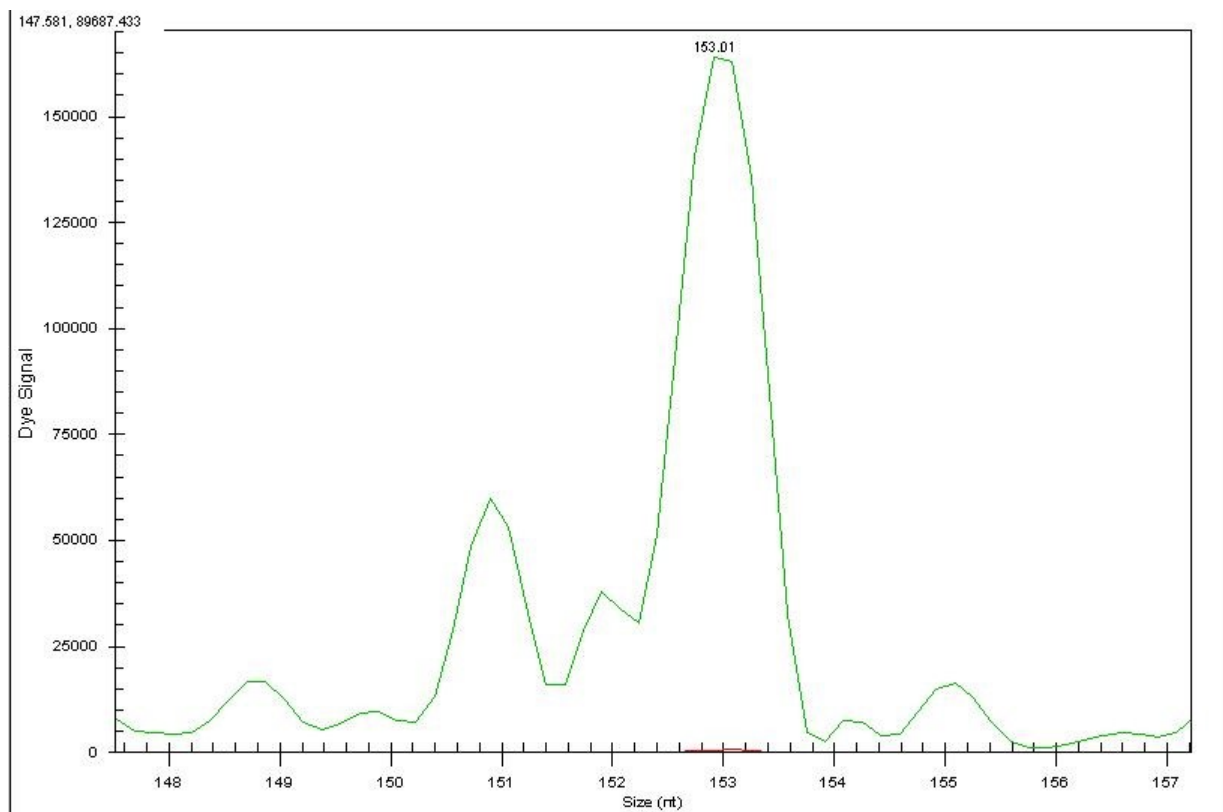

Figure 7: GUJ87\_H1

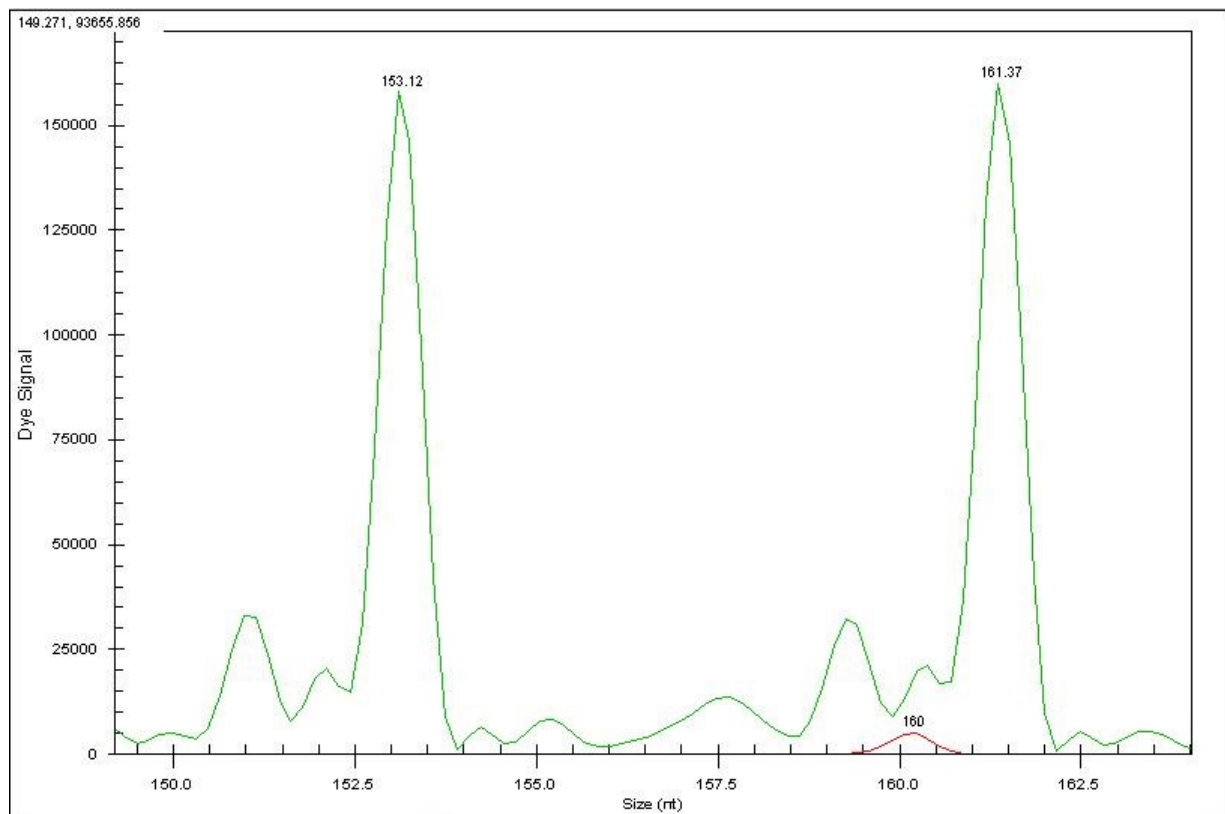

Figure 8: GUJ87\_H2

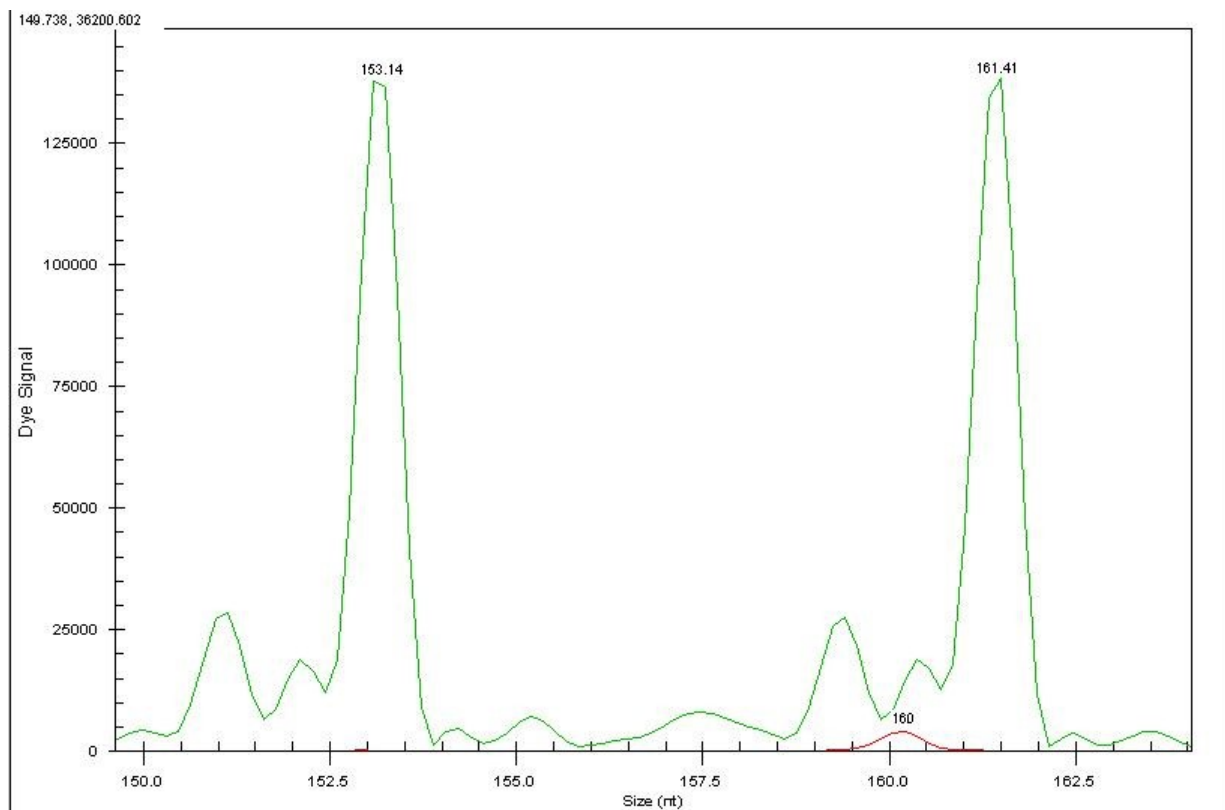

**Figure 9: Examination the gonads of an adult hybrid and adult cockerel control : p63 and DAZL immunostaining. Gonad of adult Hungarian yellow cockerel control.**

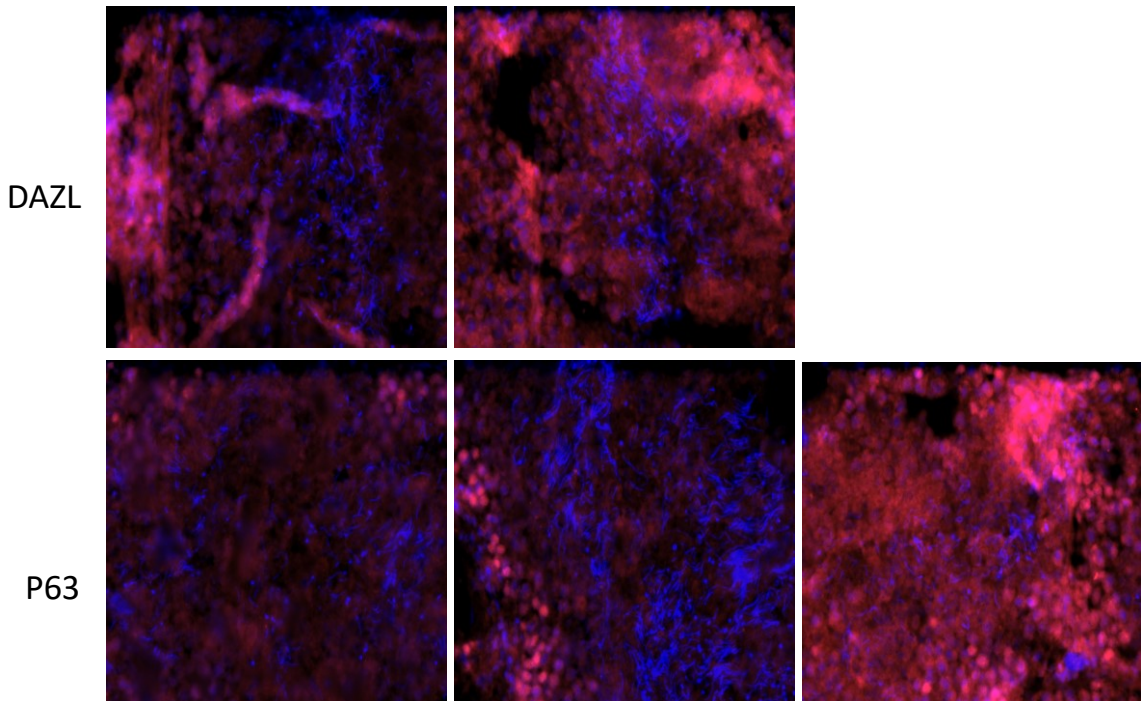

Germ cells and sperm cells are also visible

**Figure 10: Examination the gonads of an adult hybrid and adult cockerel control : p63 and DAZL immunostaining. Gonad of an adult hybrid.**

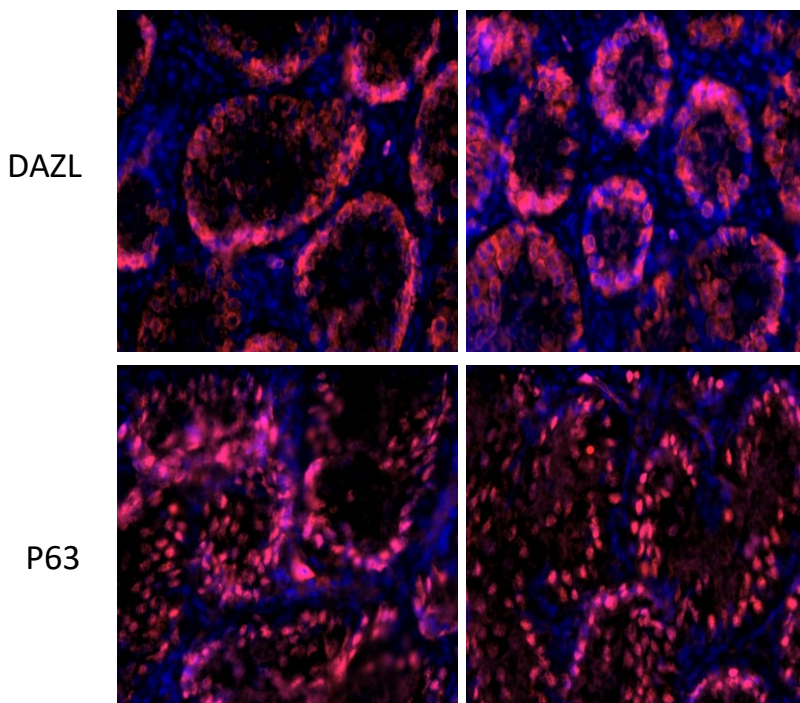

Hybrid's gonad looks like the immature testis.



**Figure 11: GFP expressing PG cells in the gonad of hybrid recipient embryos injected with 4ZP PGCs.**

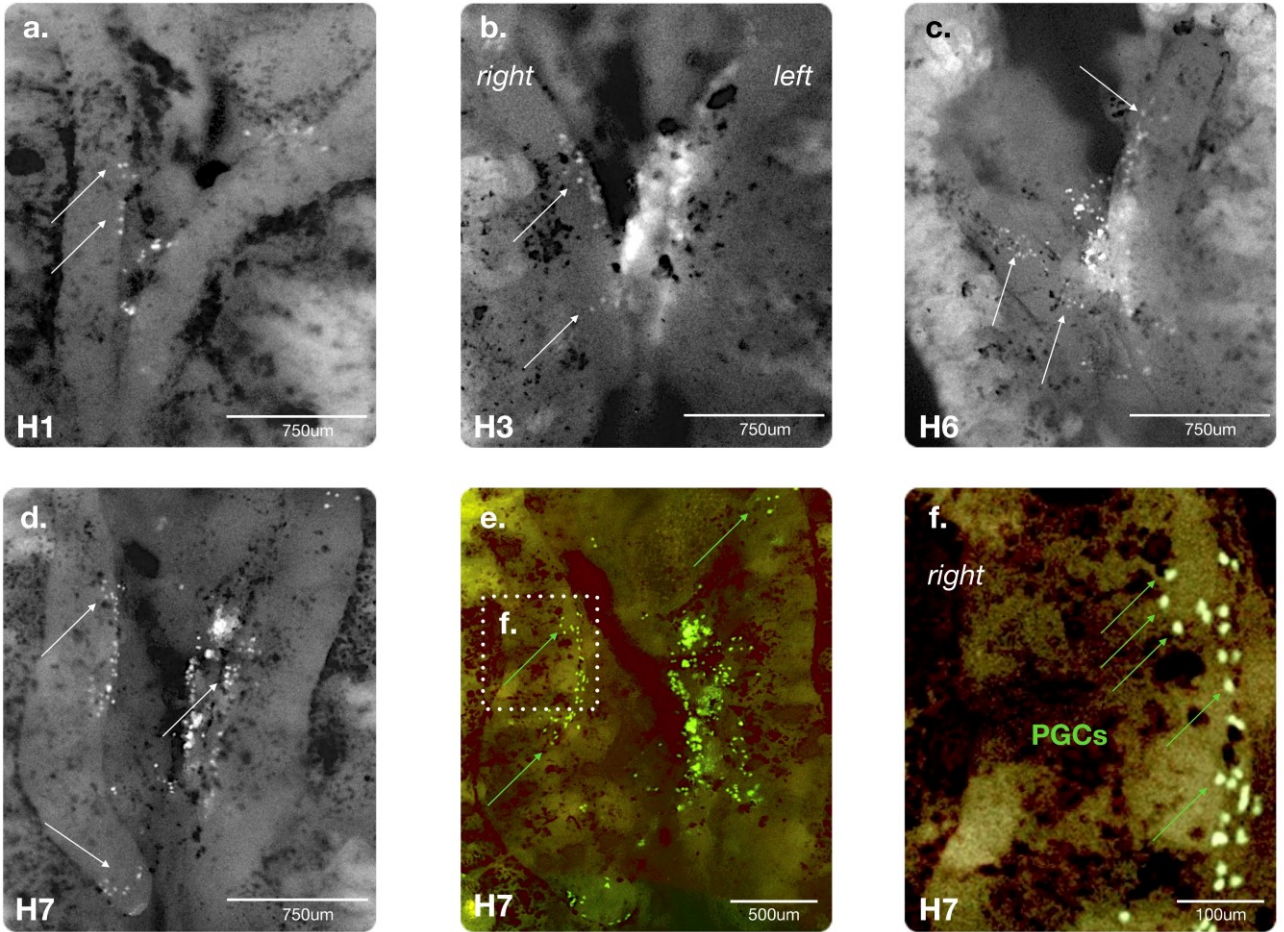

Gonads of 7.5-day-old hybrid recipient embryos (H1, H3, H6, H7). The GFP expressing PGCs entered and colonized the gonads indicating that the hybrid animals might be suitable universal recipients. Arrows indicate the integrated GFP expressing 4ZP cells in the gonads of hybrid embryos. PG cells are visible in all embryonic gonads both in the right and the left gonads.

a.: Gonads of H1 hybrid (scale bar: 750  $\mu$ m); b.: Gonads of H3 hybrid (scale bar: 750  $\mu$ m); c.: Gonads of H6 hybrid (scale bar: 750  $\mu$ m); d.: Gonads of H7 hybrid (scale bar: 750  $\mu$ m); e.: Gonads of H7 hybrid, green arrows indicate the integrated GFP-expressing PGCs into the gonads (scale bar: 500  $\mu$ m); f.: Right gonad of the H7 hybrid (scale bar: 100  $\mu$ m)

a., b., c., d: bright field images; e., f: fluorescent images
